# Supplementary material for: High maternal early-pregnancy blood glucose levels are associated with altered fetal growth and increased risk of adverse birth outcomes
Source: Springer Nature journal article supplement (doi:10.1007/s00125-019-4957-3), 2019-08-08
Supplement: MOESM1 [file 17049940]

## Electronic supplementary material

### High maternal early-pregnancy blood glucose levels are associated with altered fetal growth and increased risk of adverse birth outcomes

Madelon L. Geurtsen, Eef E.L. van Soest, Ellis Voerman,  
Eric A. P. Steegers, Vincent W.V. Jaddoe, Romy Gaillard

#### CONTENTS

**ESM Table 1** Non-response analyses

**ESM Table 2** Associations of maternal early-pregnancy glucose levels in mmol/l with fetal biometry measurements

**ESM Table 3** Associations of maternal early-pregnancy glucose levels in mmol/l with absolute fetal biometry measurements

**ESM Table 4** Associations of maternal early-pregnancy glucose levels in mmol/l with the risks of adverse birth outcomes

**ESM Table 5** Associations of maternal early-pregnancy glucose and insulin levels in SD with fetal biometry measurements

**ESM Table 6** Sensitivity analyses of fetal biometry measurements

**ESM Fig. 1** Maternal early-pregnancy glucose levels in SD and longitudinal fetal growth rates

**ESM Fig. 2** Maternal early-pregnancy insulin levels in SD and longitudinal fetal growth rates

**ESM Table 1** Non-response analyses

|                                         | Participants<br><i>N</i> = 6116 | Non-participants<br><i>n</i> = 2763 | P-value <sup>a</sup> |
|-----------------------------------------|---------------------------------|-------------------------------------|----------------------|
| <b>Maternal characteristics</b>         |                                 |                                     |                      |
| Age, years                              | 29.8 ± 5.1                      | 29.4 ± 5.8                          | 0.004                |
| Height, cm                              | 167.5 ± 7.4                     | 166.2 ± 7.4                         | <0.001               |
| Pre-pregnancy weight, kg                | 64.0 (48.0–99.7)                | 63.0 (48.0–100.0)                   | 0.386                |
| Pre-pregnancy BMI, kg/m <sup>2</sup>    | 22.6 (18.0–34.7)                | 22.8 (17.8–36.0)                    | 0.022                |
| Gestational age at intake, weeks        | 13.2 (9.6–17.6)                 | 19.6 (10.8–31.4)                    | <0.001               |
| Parity (nulliparous)                    | 3474 (57.3)                     | 1387 (51.6)                         | <0.001               |
| Ethnicity                               |                                 |                                     |                      |
| Dutch                                   | 3083 (52.2)                     | 1013 (40.4)                         | <0.001               |
| European                                | 496 (8.4)                       | 175 (7.0)                           |                      |
| Cape Verdean                            | 245 (4.2)                       | 110 (4.4)                           |                      |
| Moroccan                                | 353 (6.0)                       | 227 (9.1)                           |                      |
| Dutch Antillean                         | 171 (2.9)                       | 124 (5.0)                           |                      |
| Surinamese                              | 506 (8.6)                       | 258 (10.3)                          |                      |
| Turkish                                 | 474 (8.1)                       | 298 (11.9)                          |                      |
| Other                                   | 545 (9.3)                       | 300 (12.0)                          |                      |
| Education, higher                       | 2550 (44.9)                     | 828 (34.8)                          | <0.001               |
| Total calorie intake, kJ                | 486 ± 134                       | 489 (141)                           | 0.488                |
| Folic acid use                          |                                 |                                     |                      |
| No                                      | 1183 (25.3)                     | 745 (39.4)                          | <0.001               |
| Start first 10 weeks                    | 1491 (31.9)                     | 549 (29.1)                          |                      |
| Start periconceptional                  | 1997 (42.8)                     | 595 (31.5)                          |                      |
| Smoking during pregnancy, continued     | 1012 (18.6)                     | 428 (18.6)                          | 0.963                |
| Alcohol use during pregnancy, continued | 2095 (39.0)                     | 691 (30.5)                          | <0.001               |
| Gestational hypertensive disorders      |                                 |                                     |                      |
| Pre-eclampsia                           | 127 (2.2)                       | 60 (2.4)                            | 0.677                |
| Gestational hypertension                | 234 (4.1)                       | 84 (3.3)                            | 0.107                |
| Pre-gestational diabetes mellitus       | 24 (0.5)                        | 9 (0.4)                             | 0.754                |
| GDM                                     | 62 (1.1)                        | 29 (1.1)                            | 0.752                |
| <b>Birth Characteristics</b>            |                                 |                                     |                      |
| Males                                   | 3100 (50.7)                     | 1301(49.9)                          | 0.483                |
| Gestational age, weeks                  | 40.1 (35.6–42.3)                | 40.0 (34.7–42.4)                    | <0.001               |
| Preterm birth <sup>b</sup>              | 310 ± 5.1                       | 199 ± 7.6                           | <0.001               |
| Small for gestational age <sup>c</sup>  | 606 (10.0)                      | 254 (9.9)                           | 0.894                |
| Large for gestational age <sup>d</sup>  | 606 (10.0)                      | 234 (8.5)                           | 0.211                |
| Caesarean delivery                      | 692 (14.5)                      | 277 (13.8)                          | 0.452                |
| Vacuum extraction                       | 774 (15.9)                      | 277 (13.8)                          | 0.025                |

Values are numbers (%), means ± SD or medians (95% range)

<sup>a</sup> Differences in subject characteristics between participants and non-participants were evaluated using one-way ANOVA test for continuous variables and chi-square tests for categorical variables

<sup>b</sup> Preterm birth is defined as <37 weeks' gestation

<sup>c</sup> Small for gestational age is defined as <10<sup>th</sup> percentile of age-and sex-adjusted birth weight

<sup>d</sup> Large for gestational age is defined as >90<sup>th</sup> percentile of age-and sex-adjusted birth weight

**ESM Table 2** Associations of maternal early-pregnancy glucose levels in mmol/l with fetal biometry measurements

| <b>Maternal early-pregnancy glucose levels in mmol/l</b> |                       |                         |                     |                        |
|----------------------------------------------------------|-----------------------|-------------------------|---------------------|------------------------|
| Early pregnancy                                          | Crown-rump Length     |                         |                     |                        |
| Basic model <sup>a</sup>                                 | -0.02 (-0.08, 0.03)   |                         |                     |                        |
| Ethnicity model <sup>b</sup>                             | -0.02 (-0.08, 0.03)   |                         |                     |                        |
| Maternal pregnancy-related factors model <sup>c</sup>    | -0.04 (-0.09, 0.02)   |                         |                     |                        |
| BMI model <sup>d</sup>                                   | -0.04 (-0.09, 0.02)   |                         |                     |                        |
| Mid-pregnancy                                            | Head circumference    | Abdominal circumference | Femur length        | Estimated fetal weight |
| Basic model <sup>a</sup>                                 | -0.03 (-0.06, 0.00)*  | -0.05 (-0.08, -0.02)*   | 0.01 (-0.02, 0.04)  | -0.02 (-0.05, 0.01)    |
| Ethnicity model <sup>b</sup>                             | -0.03 (-0.06, 0.00)   | -0.04 (-0.07, -0.01)*   | 0.01 (-0.02, 0.04)  | -0.02 (-0.05, 0.01)    |
| Maternal pregnancy-related factors model <sup>c</sup>    | -0.03 (-0.06, 0.00)   | -0.05 (-0.08, -0.02)*   | 0.01 (-0.02, 0.04)  | -0.02 (-0.05, 0.01)    |
| BMI model <sup>d</sup>                                   | -0.04 (-0.07, -0.01)* | -0.06 (-0.09, -0.02)*   | -0.01 (-0.04, 0.02) | -0.04 (-0.07, -0.01)*  |
| Late pregnancy                                           | Head circumference    | Abdominal circumference | Femur length        | Estimated fetal weight |
| Basic model <sup>a</sup>                                 | 0.03 (-0.01, 0.06)    | 0.05 (0.02, 0.08)*      | 0.04 (0.01, 0.07)*  | 0.05 (0.02, 0.08)*     |
| Ethnicity model <sup>b</sup>                             | 0.03 (0.00, 0.06)*    | 0.05 (0.02, 0.08)*      | 0.04 (0.01, 0.07)*  | 0.05 (0.02, 0.08)*     |
| Maternal pregnancy-related factors model <sup>c</sup>    | 0.03 (0.00, 0.06)     | 0.04 (0.01, 0.07)*      | 0.03 (0.00, 0.06)*  | 0.04 (0.01, 0.07)*     |
| BMI model <sup>d</sup>                                   | 0.02 (-0.02, 0.05)    | 0.02 (-0.01, 0.05)      | 0.01 (-0.02, 0.04)  | 0.02 (-0.01, 0.05)     |
| Birth                                                    | Head circumference    | Abdominal circumference | Length              | Weight                 |
| Basic model <sup>a</sup>                                 | 0.04 (0.00, 0.09)     | NA                      | 0.04 (-0.01, 0.08)  | 0.07 (0.04, 0.11)*     |
| Ethnicity model <sup>b</sup>                             | 0.05 (0.01, 0.10)*    | NA                      | 0.04 (0.00, 0.09)*  | 0.08 (0.05, 0.11)*     |
| Maternal pregnancy-related factors model <sup>c</sup>    | 0.04 (0.00, 0.09)     | NA                      | 0.04 (-0.01, 0.08)  | 0.07 (0.04, 0.10)*     |
| BMI model <sup>d</sup>                                   | 0.04 (-0.01, 0.08)    | NA                      | 0.02 (-0.02, 0.07)  | 0.05 (0.02, 0.08)*     |

Data are SDS values (95% CI) from linear regression models that reflect the differences in growth characteristics per 1 mmol/l in maternal early-pregnancy glucose levels. Analyses with crown-rump length were based on subgroup analyses ( $n = 1470$ ). Estimates are from multiple imputed data

<sup>a</sup> Basic model adjusted for gestational age at assessment

<sup>b</sup> Ethnicity model: basic model additionally adjusted for maternal ethnicity

<sup>c</sup> Maternal pregnancy-related factors model: ethnicity model additionally adjusted for maternal age, parity, educational level, daily total calorie intake, smoking, alcohol consumption and folic acid supplement use

<sup>d</sup> BMI model: maternal pregnancy-related factors model additionally adjusted for maternal prepregnancy BMI

\* $p < 0.05$

Abbreviations: NA, not available

**ESM Table 3** Associations of maternal early-pregnancy glucose levels in mmol/l with absolute fetal biometry measurements

| <b>Maternal early-pregnancy glucose levels in mmol/l</b> | <b>Head circumference (mm) / at birth (cm)</b> | <b>Abdominal circumference (mm) / NA</b> | <b>Femur length (mm) / length at birth (cm)</b> | <b>Estimated fetal weight (gram) / weight at birth (gram)</b> |
|----------------------------------------------------------|------------------------------------------------|------------------------------------------|-------------------------------------------------|---------------------------------------------------------------|
| Mid-pregnancy                                            | -0.32 (-0.72, 0.08)                            | -0.51 (-0.92, -0.10)*                    | -0.02 (-0.11, 0.08)                             | -1.95 (-4.48, 0.57)                                           |
| Late pregnancy                                           | 0.26 (-0.12, 0.63)                             | 0.55 (0.06, 1.05)*                       | 0.08 (-0.01, 0.17)                              | 8.46 (0.86, 16.06)*                                           |
| Birth                                                    | 0.04 (-0.03, 0.11)                             | NA                                       | 0.07 (-0.02, 0.15)                              | 25.38 (8.98, 41.79)*                                          |

Data are exact values (95% CI) from linear regression models that reflect the differences in growth characteristics per 1 mmol/l in maternal early-pregnancy glucose levels. Estimates are from multiple imputed data. Models are adjusted according maternal pregnancy-related factors model adjusted for gestational age at assessment, maternal ethnicity, age, parity, educational level, daily total calorie intake, smoking, alcohol consumption and folic acid supplement use

\* $p < 0.05$

Abbreviations: NA, not available.

**ESM Table 4** Associations of maternal early-pregnancy glucose levels in mmol/l with the risks of adverse birth outcomes

| <b>Maternal early-pregnancy glucose levels<sup>0</sup> mmol/l</b> | <b>Small size for gestational age at birth</b> | <b>Large size for gestational age at birth</b> | <b>Preterm birth</b> | <b>Caesarean delivery</b> | <b>Vacuum extraction</b> |
|-------------------------------------------------------------------|------------------------------------------------|------------------------------------------------|----------------------|---------------------------|--------------------------|
| Basic model <sup>a</sup>                                          | 0.89 (0.80, 0.98)*                             | 1.27 (1.16, 1.40)*                             | 1.08 (0.95, 1.24)    | 1.12 (0.98, 1.27)         | 0.99 (0.90, 1.09)        |
| Ethnicity model <sup>b</sup>                                      | 0.87 (0.79, 0.97)*                             | 1.29 (1.18, 1.42)*                             | 1.08 (0.94, 1.23)    | 1.12 (0.99, 1.27)         | 1.00 (0.91, 1.11)        |
| Maternal pregnancy-related factors model <sup>c</sup>             | 0.88 (0.79, 0.98)*                             | 1.28 (1.16, 1.41)*                             | 1.08 (0.94, 1.23)    | 1.11 (1.00, 1.23)         | 1.01 (0.91, 1.12)        |
| BMI model <sup>d</sup>                                            | 0.91 (0.82, 1.02)                              | 1.21 (1.10, 1.34)*                             | 1.06 (0.92, 1.21)    | 1.09 (0.99, 1.20)         | 1.01 (0.90, 1.12)        |

Values are ORs (95% CI) from logistic regression models that reflect the differences in risks of adverse birth outcomes per 1 mmol/l in maternal early-pregnancy glucose levels. Estimates are from multiple imputed data

<sup>a</sup> Basic model adjusted for gestational age at assessment

<sup>b</sup> Ethnicity model: basic model additionally adjusted for maternal ethnicity

<sup>c</sup> Maternal pregnancy-related factors model: ethnicity model additionally adjusted for maternal age, parity, educational level, daily total calorie intake, smoking, alcohol consumption and folic acid supplement use

<sup>d</sup> BMI model: maternal pregnancy-related factors model additionally adjusted for maternal prepregnancy BMI

\* $p < 0.05$

**ESM Table 5** Associations of maternal early-pregnancy glucose and insulin levels in SD with fetal biometry measurements

| <b>Early pregnancy</b> | <b>Crown-rump Length</b>  |                                |                     |                               |
|------------------------|---------------------------|--------------------------------|---------------------|-------------------------------|
| Glucose (SD)           | -0.02 (-0.07, 0.03)       |                                |                     |                               |
| Insulin (SD)           | -0.02 (-0.07, 0.04)       |                                |                     |                               |
| <b>Mid-pregnancy</b>   | <b>Head circumference</b> | <b>Abdominal circumference</b> | <b>Femur length</b> | <b>Estimated fetal weight</b> |
| Glucose (SD)           | -0.02 (-0.05, 0.00)       | -0.04 (-0.07, -0.02)*          | 0.01 (-0.02, 0.03)  | -0.02 (-0.05, 0.00)           |
| Insulin (SD)           | -0.01 (-0.04, 0.02)       | -0.02 (-0.04, 0.01)            | 0.04 (0.01, 0.06)*  | 0.01 (-0.02, 0.03)            |
| <b>Late pregnancy</b>  | <b>Head circumference</b> | <b>Abdominal circumference</b> | <b>Femur length</b> | <b>Estimated fetal weight</b> |
| Glucose (SD)           | 0.02 (0.00, 0.05)         | 0.03 (0.01, 0.06)*             | 0.03 (0.00, 0.05)*  | 0.04 (0.01, 0.06)*            |
| Insulin (SD)           | 0.00 (-0.03, 0.03)        | 0.04 (0.01, 0.06)*             | 0.06 (0.04, 0.09)*  | 0.05 (0.03, 0.08)*            |
| <b>Birth</b>           | <b>Head circumference</b> | <b>Abdominal circumference</b> | <b>Length</b>       | <b>Weight</b>                 |
| Glucose (SD)           | 0.04 (0.00, 0.08)         | NA                             | 0.03 (0.00, 0.07)   | 0.06 (0.04, 0.09)*            |
| Insulin (SD)           | 0.06 (0.01, 0.09)*        | NA                             | 0.08 (0.04, 0.12)*  | 0.06 (0.03, 0.08)*            |

Data are SDS values (95% CI) from linear regression models that reflect the differences in growth characteristics per 1 SD change in maternal early-pregnancy glucose and insulin levels. Insulin was logtransformed before the construction of SD score. Analyses with crown-rump length were based on subgroup analyses ( $n = 1470$ ). Estimates are from multiple imputed data. Models are adjusted according maternal pregnancy-related factors model adjusted for gestational age at assessment, maternal ethnicity, age, parity, educational level, daily total calorie intake, smoking, alcohol consumption and folic acid supplement use

\* $p < 0.05$

Abbreviations: NA, not available

**ESM Table 6** Sensitivity analyses of fetal biometry measurements

| <b>Early pregnancy</b>               | <b>Crown-rump Length</b>  |                                |                     |                               |
|--------------------------------------|---------------------------|--------------------------------|---------------------|-------------------------------|
| Main model                           | -0.04 (-0.09, 0.02)       |                                |                     |                               |
| No pre-gestational diabetes mellitus | -0.05 (-0.10, 0.01)       |                                |                     |                               |
| No gestational diabetes mellitus     | -0.05 (-0.11, 0.01)       |                                |                     |                               |
| Dutch ethnicity                      | -0.04 (-0.11, 0.03)       |                                |                     |                               |
| Included <14 weeks gestation         | -0.04 (-0.10, 0.02)       |                                |                     |                               |
| No preterm                           | -0.05 (-0.11, 0.01)       |                                |                     |                               |
| <b>Mid-pregnancy</b>                 | <b>Head circumference</b> | <b>Abdominal circumference</b> | <b>Femur length</b> | <b>Estimated fetal weight</b> |
| Main model                           | -0.03 (-0.06, 0.00)       | -0.05 (-0.08, -0.02)*          | 0.01 (-0.02, 0.04)  | -0.02 (-0.05, 0.01)           |
| No pre-gestational diabetes mellitus | -0.02 (-0.06, 0.01)       | -0.05 (-0.08, -0.02)*          | 0.01 (-0.03, 0.04)  | -0.03 (-0.06, 0.00)           |
| No gestational diabetes mellitus     | -0.03 (-0.06, 0.00)       | -0.05 (-0.08, -0.02)*          | 0.01 (-0.02, 0.04)  | -0.03 (-0.06, 0.00)           |
| Dutch ethnicity                      | -0.04 (-0.09, 0.00)       | -0.07 (-0.12, -0.03)*          | 0.01 (-0.03, 0.05)  | -0.04 (-0.08, 0.00)           |
| Included <14 weeks gestation         | 0.00 (-0.02, 0.02)        | -0.04 (-0.07, -0.01)*          | 0.03 (-0.01, 0.06)  | -0.01 (-0.04, 0.03)           |
| No preterm                           | -0.03 (-0.06, 0.01)       | -0.05 (-0.08, -0.02)*          | 0.00 (-0.03, 0.03)  | -0.03 (-0.06, 0.00)           |
| <b>Late pregnancy</b>                | <b>Head circumference</b> | <b>Abdominal circumference</b> | <b>Femur length</b> | <b>Estimated fetal weight</b> |
| Main model                           | 0.03 (0.00, 0.06)         | 0.04 (0.01, 0.07)*             | 0.03 (0.00, 0.06)*  | 0.04 (0.01, 0.07)*            |
| No pre-gestational diabetes mellitus | 0.03 (0.00, 0.06)         | 0.03 (0.00, 0.06)              | 0.02 (-0.01, 0.06)  | 0.03 (0.00, 0.07)*            |
| No gestational diabetes mellitus     | 0.02 (-0.01, 0.05)        | 0.03 (0.00, 0.06)*             | 0.03 (0.00, 0.06)*  | 0.04 (0.01, 0.07)*            |
| Dutch ethnicity                      | 0.00 (-0.05, 0.04)        | 0.02 (-0.02, 0.07)             | 0.03 (-0.01, 0.07)  | 0.03 (-0.01, 0.07)            |
| Included <14 weeks gestation         | 0.04 (0.00, 0.08)*        | 0.04 (0.00, 0.08)*             | 0.06 (0.02, 0.10)*  | 0.06 (0.02, 0.09)*            |
| No preterm                           | 0.03 (-0.01, 0.06)        | 0.03 (0.00, 0.07)*             | 0.03 (0.00, 0.06)*  | 0.04 (0.01, 0.07)*            |
| <b>Birth</b>                         | <b>Head circumference</b> | <b>Abdominal circumference</b> | <b>Length</b>       | <b>Weight</b>                 |
| Main model                           | 0.04 (0.00, 0.09)         | NA                             | 0.04 (-0.01, 0.08)  | 0.07 (0.04, 0.10)*            |
| No pre-gestational diabetes mellitus | 0.03 (-0.02, 0.08)        | NA                             | 0.04 (0.00, 0.09)   | 0.07 (0.04, 0.10)*            |
| No gestational diabetes mellitus     | 0.04 (-0.01, 0.09)        | NA                             | 0.04 (-0.01, 0.08)  | 0.06 (0.04, 0.10)*            |
| Dutch ethnicity                      | 0.02 (-0.04, 0.08)        | NA                             | 0.02 (-0.03, 0.08)  | 0.06 (0.01, 0.10)*            |
| Included <14 weeks gestation         | 0.02 (-0.04, 0.08)        | NA                             | 0.03 (-0.02, 0.08)  | 0.09 (0.05, 0.12)*            |
| No preterm                           | 0.05 (0.00, 0.10)*        | NA                             | 0.04 (-0.01, 0.08)  | 0.07 (0.04, 0.10)*            |

Data are SDS values (95% CI) from linear regression models that reflect the differences in growth characteristics per 1 mmol/l in maternal early-pregnancy glucose levels. Analyses with crown-rump length were based on subgroup analyses ( $n = 1470$ ). Estimates are from multiple imputed data. Models are adjusted according maternal pregnancy-related factors model adjusted for gestational age at assessment, maternal ethnicity, age, parity, educational level, daily total calorie intake, smoking, alcohol consumption and folic acid supplement use

\* $p < 0.05$

Abbreviations: NA, not available



**ESM Fig. 1**

Circles = Head circumference  
Triangles = Length  
Squares = Weight

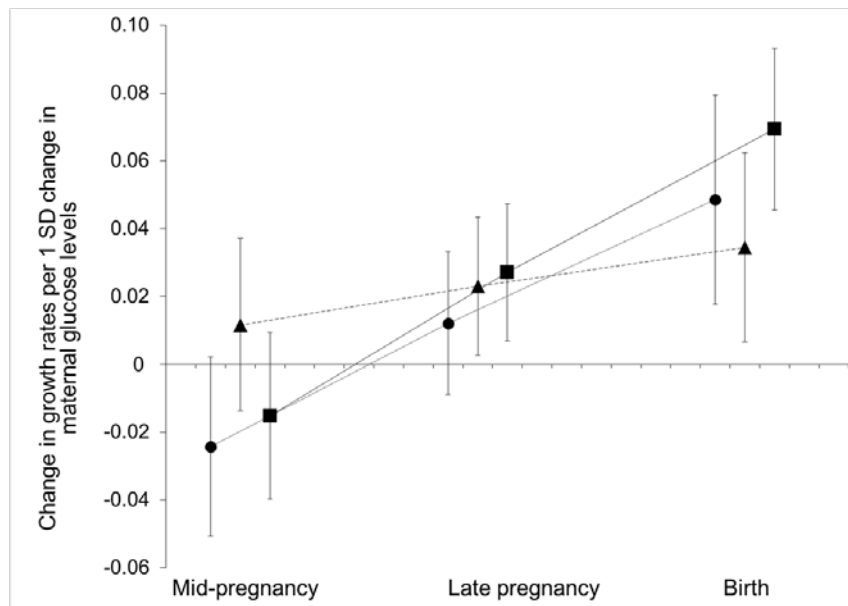

**Maternal early-pregnancy glucose levels in SD and longitudinal fetal growth rates.** Data are SDS values (95% CI) from repeated measurement regression models that reflect the differences in gestational age-adjusted growth rates in SDS of head circumference (circles), length (triangles), and weight (squares) at mid-pregnancy, late pregnancy and at birth per 1 SD change in maternal early-pregnancy glucose levels. As a measure of skeletal length growth from mid-pregnancy onwards, we used fetal femur length SDS in mid-pregnancy and late pregnancy and total body length SDS at birth within the repeated measurements model. All fetal biometry measurements for each pregnancy period were taken at the same time point. The models were adjusted for gestational age at intake. *p* value for interaction with gestational age for all models <0.05.

**ESM Fig. 2**

Circles = Head circumference  
Triangles = Length  
Squares = Weight

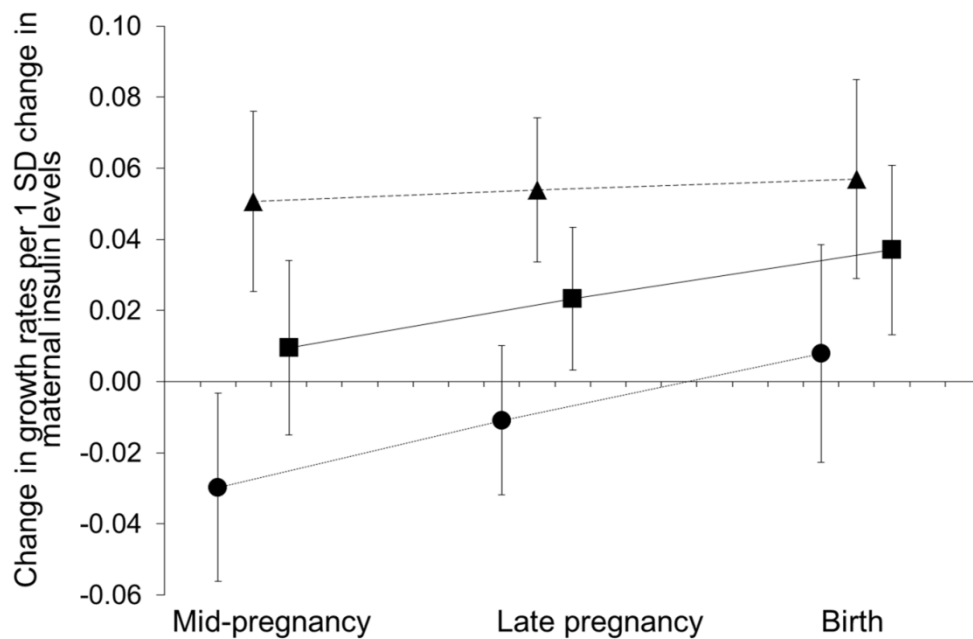

**Maternal early-pregnancy insulin levels in SD and longitudinal fetal growth rates.** Data are SDS values (95% CI) from repeated measurement regression models that reflect the differences in gestational age-adjusted growth rates in SDS of head circumference (circles), length (triangles), and weight (squares) at mid-pregnancy, late pregnancy and at birth per 1 SD change in maternal early-pregnancy insulin levels. As a measure of skeletal length growth from mid-pregnancy onwards, we used fetal femur length SDS in mid-pregnancy and late pregnancy and total body length SDS at birth within the repeated measurements model. All fetal biometry measurements for each pregnancy period were taken at the same time point. The models were adjusted for gestational age at intake. *p* value for interaction with gestational age for all models <0.05.
